# Supplementary material for: Intensity-Modulated Radiotherapy (IMRT) following Conservative Surgery of the Supraglottic Region: Impact on Functional Outcomes
Source: MDPI journal article supplement (doi:10.3390/cancers14112600), 2022-05-24
Supplement: s1 [file s1]

## Supplementary Materials

**Table S1.** Acute toxicity profile of 20 patients treated with CS and PORT IMRT for SG locally advanced cancers according Common Terminology Criteria Adverse Event (CTCAE) scale (v 4.03)

| Toxicity             | Grade   |         |        |
|----------------------|---------|---------|--------|
|                      | G0 (%)  | G1 (%)  | G2 (%) |
| Anatomic mucositis * | 0       | 17 (85) | 3 (15) |
| Functional mucositis | 2 (10)  | 15 (75) | 3 (15) |
| Dysphagia            | 2 (10)  | 14 (70) | 4 (20) |
| Xerostomia           | 3 (15)  | 14 (70) | 3 (15) |
| Skin toxicity *      | 0       | 11 (55) | 9 (45) |
| Dysphonia            | 2 (10)  | 11 (55) | 4 (20) |
| Weight loss          | 15 (75) | 5 (25)  | 0      |

\*Assessed per the Radiation Therapy Oncology Group (RTOG)/European Organization of Research and Treatment of Cancer (EORTC) scoring system (EORTC-RTOG). Median Mean weight loss was 1.45 Kg (IQR 3.35 -0.45 Kg). The median value of maximum pain was 5 (range 3-5).

**Table S2.** Detailed description of the 20 patients treated with conservative surgery and postoperative radiotherapy for supraglottic tumors

| Gender | Age | Smoking habit | Comorbidities | Surgery | Enlarged surgery | Arytenoid removal | Tumor grading | Surgical margins | Perineural invasion | Lymphovascular invasion | Extracapsular extension | Pathologic tumor stage | Pathologic lymph node stage | Concurrent chemotherapy | Tracheostomy during radiotherapy | Mean dose absorbed to the remnant larynx | Maximum dose absorbed to the remnant larynx | Temporary tracheostomy during follow-up | Tracheostomy at last follow-up | Enteral nutrition during follow-up | Enteral nutrition during follow-up |
|--------|-----|---------------|---------------|---------|------------------|-------------------|---------------|------------------|---------------------|-------------------------|-------------------------|------------------------|-----------------------------|-------------------------|----------------------------------|------------------------------------------|---------------------------------------------|-----------------------------------------|--------------------------------|------------------------------------|------------------------------------|
| M      | 74  | Ex            | Yes           | E       | No               | No                | G3            | Neg              | No                  | No                      | Yes                     | T1                     | N1                          | No                      | No                               | 60.77                                    | 67.29                                       | Yes                                     | Yes                            | Yes                                | Yes                                |
| M      | 58  | Ex            | No            | O       | Yes              | No                | G3            | Close            | Yes                 | Yes                     | Yes                     | T2                     | N3                          | Yes                     | No                               | 62.59                                    | 64.35                                       | No                                      | No                             | No                                 | No                                 |
| M      | 70  | No            | No            | O       | No               | Yes               | G1            | Pos              | No                  | No                      | No                      | T3                     | N0                          | No                      | No                               | 61.42                                    | 63.95                                       | No                                      | No                             | No                                 | No                                 |
| M      | 54  | Ex            | Yes           | O       | No               | No                | G1            | Neg              | No                  | No                      | Yes                     | T2                     | N1                          | No                      | No                               | 61.11                                    | 62.96                                       | Yes                                     | No                             | Yes                                | No                                 |
| M      | 64  | Ex            | Yes           | O       | Yes              | No                | G3            | Pos              | Yes                 | No                      | Yes                     | T3                     | N2c                         | Yes                     | No                               | 62.32                                    | 69.33                                       | Yes                                     | No                             | No                                 | No                                 |
| M      | 67  | Ex            | Yes           | E       | Yes              | No                | G3            | Neg              | No                  | No                      | No                      | T1                     | N2b                         | No                      | No                               | 61.71                                    | 63.46                                       | No                                      | No                             | No                                 | No                                 |
| M      | 53  | Ex            | No            | O       | Yes              | Yes               | G3            | Close            | No                  | No                      | No                      | T3                     | N0                          | No                      | No                               | 60.14                                    | 70.22                                       | No                                      | No                             | No                                 | No                                 |
| M      | 60  | Yes           | No            | O       | No               | No                | G2            | Neg              | No                  | Yes                     | Yes                     | T1                     | N3                          | No                      | No                               | 68.96                                    | 71.67                                       | No                                      | No                             | No                                 | No                                 |
| F      | 62  | Ex            | No            | O       | Yes              | No                | G3            | Neg              | No                  | No                      | No                      | T2                     | N2c                         | Yes                     | No                               | 46.95                                    | 66.19                                       | No                                      | No                             | No                                 | No                                 |
| M      | 57  | Ex            | No            | O       | Yes              | No                | G2            | Pos              | No                  | No                      | No                      | T3                     | N2c                         | No                      | No                               | 61.06                                    | 68.28                                       | No                                      | No                             | No                                 | No                                 |
| M      | 59  | Ex            | Yes           | O       | No               | Yes               | G1            | Neg              | Yes                 | No                      | No                      | T3                     | N0                          | No                      | No                               | 60.96                                    | 63.38                                       | No                                      | No                             | No                                 | No                                 |
| M      | 58  | Ex            | Yes           | O       | No               | Yes               | G2            | Neg              | No                  | No                      | No                      | T3                     | N2a                         | No                      | Yes                              | 60.20                                    | 62.58                                       | No                                      | No                             | No                                 | No                                 |
| M      | 61  | Yes           | Yes           | O       | No               | No                | G2            | Neg              | No                  | No                      | Yes                     | T3                     | N1                          | Yes                     | No                               | 37.90                                    | 61.76                                       | No                                      | No                             | No                                 | No                                 |
| F      | 71  | Yes           | Yes           | O       | No               | No                | G3            | Close            | No                  | No                      | No                      | T3                     | N0                          | No                      | Yes                              | 58.40                                    | 68.12                                       | Yes                                     | No                             | No                                 | No                                 |
| F      | 62  | Yes           | Yes           | O       | No               | Yes               | G2            | Neg              | No                  | No                      | Yes                     | T3                     | N2c                         | Yes                     | Yes                              | 59.71                                    | 63.74                                       | Yes                                     | No                             | No                                 | No                                 |
| M      | 60  | Ex            | Yes           | O       | No               | Yes               | G2            | Neg              | Yes                 | No                      | No                      | T4a                    | N0                          | No                      | No                               | 60.33                                    | 63.04                                       | No                                      | No                             | No                                 | No                                 |
| M      | 41  | Yes           | Yes           | O       | No               | Yes               | G3            | Neg              | No                  | No                      | No                      | T3                     | N0                          | No                      | No                               | 61.69                                    | 69.72                                       | No                                      | No                             | No                                 | No                                 |
| F      | 60  | Ex            | No            | E       | No               | No                | G3            | Neg              | No                  | No                      | No                      | T2                     | N2a                         | No                      | No                               | 44.45                                    | 63.50                                       | No                                      | No                             | No                                 | No                                 |
| M      | 75  | Yes           | Yes           | O       | No               | Yes               | G2            | Neg              | Yes                 | No                      | Yes                     | T3                     | N2b                         | No                      | No                               | 61.04                                    | 66.51                                       | Yes                                     | No                             | No                                 | No                                 |
| M      | 56  | Ex            | No            | O       | No               | No                | G3            | Neg              | No                  | No                      | No                      | T4a                    | N0                          | No                      | 0                                | 58.81                                    | 66.90                                       | Yes                                     | No                             | No                                 | No                                 |

Abbreviation: E= endoscopic surgery, O= open surgery, Neg= negative, Pos= positive.

**Comment to Supplementary Table S2:** Of the six patients (35%) requiring the positioning of a temporary tracheostomy: two had acute respiratory distress, three severe laryngeal edema or stenosis requiring endoscopic dilatation, and one delayed tracheostoma healing. Tracheostomy was left in place in five patients for a median period of 23 days (IQR 19-90 days).

Both of the patients requiring temporary enteral nutrition had also respiratory distress requiring tracheostomy. One patient died (after 373 days) with both tracheostomy and percutaneous enteral gastrostomy still in place. For the second patient the feeding

tube was removed after one month but, due to the persistent swallowing defects, a plastic surgery at the base of tongue (lipofilling) was performed.

**Table S3.** Correlation between risk factors and long-term side effects.

|                                              | Temporary Tracheostomy due to Stenosis/Edema | Tracheostomy at PEG Last Follow-up | Tracheostomy During Follow-up | Chondronecrosis | Enteral Nutrition |
|----------------------------------------------|----------------------------------------------|------------------------------------|-------------------------------|-----------------|-------------------|
| Sex (female vs male)                         | 0.05                                         | 0.16                               | 0.57                          | 0.02            | 1                 |
| Radiation technique (VMAT vs 3D CRT)         | 0.30                                         | 0.64                               | 0.69                          | 0.12            | 1                 |
| Tracheostomy during radiotherapy (Yes vs no) | 0.53                                         | 0.62                               | 0.40                          | 1               | 1                 |
| Surgery technique (Open vs endoscopic)       | 0.09                                         | 0.63                               | 0.44                          | 0.51            | 1                 |
| Enlarged tongue base (yes vs no)             | 0.57                                         | 1                                  | 0.53                          | 1               | 1                 |
| Arytenoid removal (yes vs no)                | 0.71                                         | 0.09                               | 1                             | 1               | 0.26              |
| Age                                          | 0.58                                         | 0.88                               | 0.31                          | 0.65            | 0.05              |

**Table S4:** Toxicity profile of patients treated with conservative surgery and postoperative radiotherapy for SG performed with no-IMRT techniques and current series.

|                              | Treatment | Number of Patients | Permanent Gastrostomy | Persistent Aspiration | Permanent Tracheostomy | Acute Respiratory Distress | Laryngeal Stenosis | Laryngeal Necrosis |
|------------------------------|-----------|--------------------|-----------------------|-----------------------|------------------------|----------------------------|--------------------|--------------------|
| Steniger et al. 1997 [11]    | 3D CRT    | 17                 | 35%                   | 29.4%                 | 23.5%                  | 29%                        | NR                 | NR                 |
| Spriano et al. 2000 [10]     | 3D CRT*   | 56                 | 0%                    | 9%                    | 1%                     | NR                         | NR                 | 1%                 |
| Laccourreye et al. 2000 [24] | Co60      | 90                 | 2.2%                  | 3.3%                  | 1.1%                   | NR                         | 4.4%               | 5.5%               |
| Garibaldi et al. 2009 [21]   | 2D/3D CRT | 36                 | NR                    | NR                    | 0%                     | 3%                         | NR                 | NR                 |
| Current series               | IMRT      | 20                 | 0%                    | 0%                    | 5%                     | 15%                        | 15%                | 0%                 |

\* 25 patients were treated with non-standard (accelerated hyperfractionated) fractionation schedules.
